# Supplementary material for: The effects of metal oxide blended activated coke on flue gas desulphurization
Source: Royal Society of Chemistry journal article supplement (doi:10.1039/c6ra05407b), 2016-01-01
Supplement: c6ra05407b1.pdf [file c6ra05407b1.pdf]

# **The effects of metal oxides blended activated coke on flue gas desulfurization**

Lin Yang,<sup>a</sup> Tian Huang,<sup>c</sup> Xia Jiang,<sup>ab</sup> Jianjun Li,<sup>ab</sup> and Wenju Jiang<sup>\*ab</sup>

<sup>a</sup>College of Architecture and Environment, Sichuan University, Chengdu 610065, P.R. China

<sup>b</sup>National Engineering Research Center for Flue Gas Desulfurization, Chengdu 610065, P.R. China

<sup>c</sup>Chengdu Development Center of Science and Technology, China Academy of Engineering Physics, Chengdu, 620107, P.R. China.

\*Corresponding author: Wenju Jiang

Email: [wenjujiang@scu.edu.cn](mailto:wenjujiang@scu.edu.cn)

Tel: 86-28-85467800, Fax: 86-28-85405613

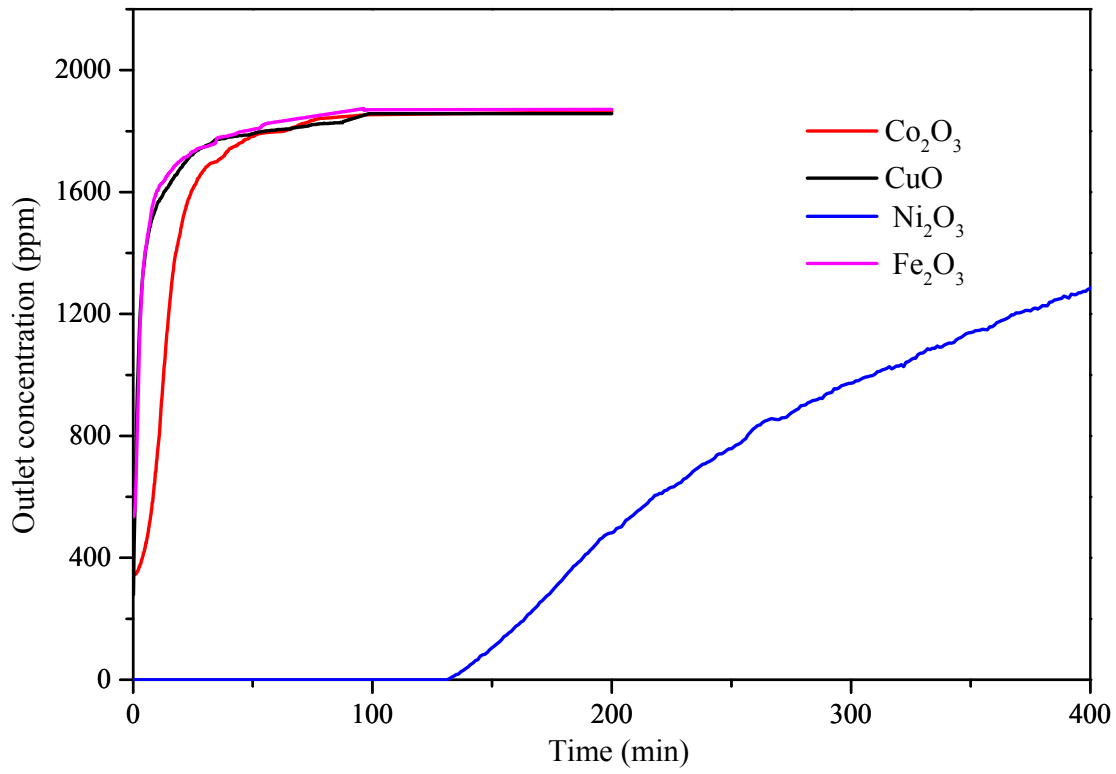

Fig. S1 Breakthrough curves of the metal oxides for flue gas desulfurization

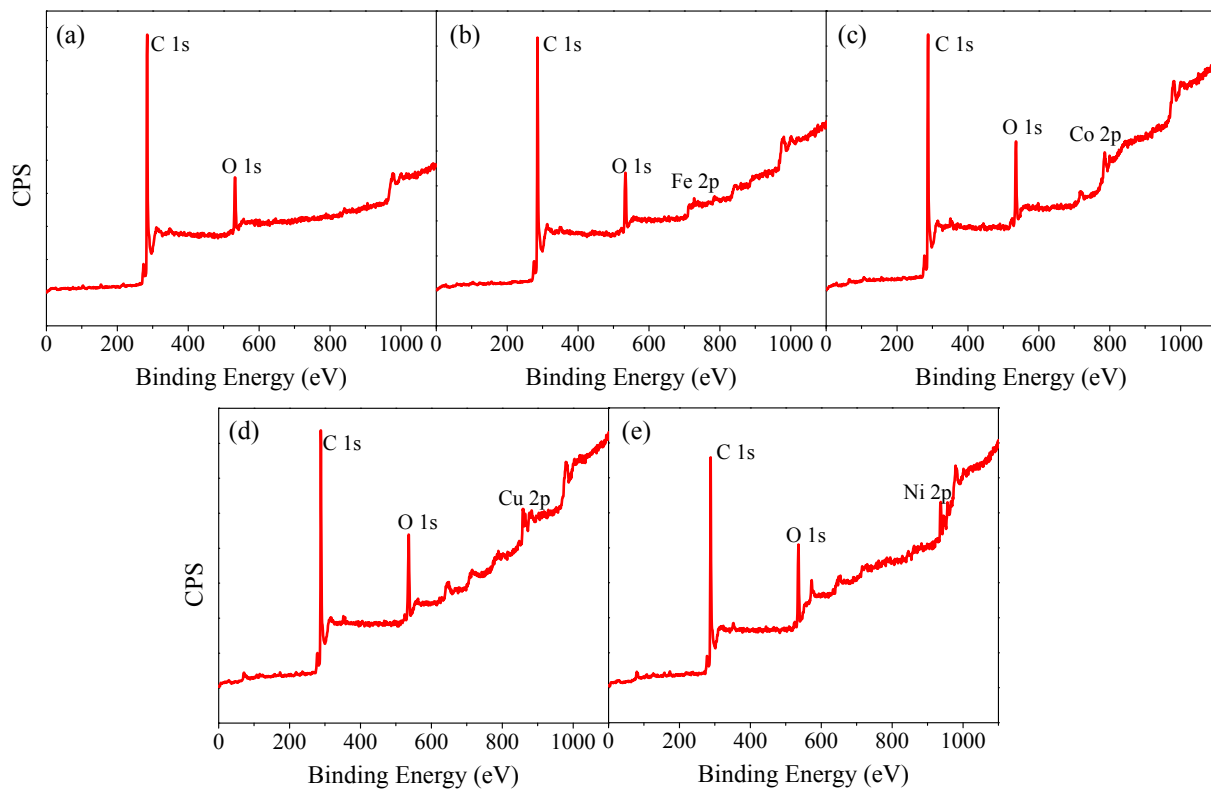

Fi

g. S2 Overall XPS spectra of prepared activated coke: AC (a), Fe8/AC (b), Co16/AC (c), Cu16/AC (d), and Ni12/AC (e).

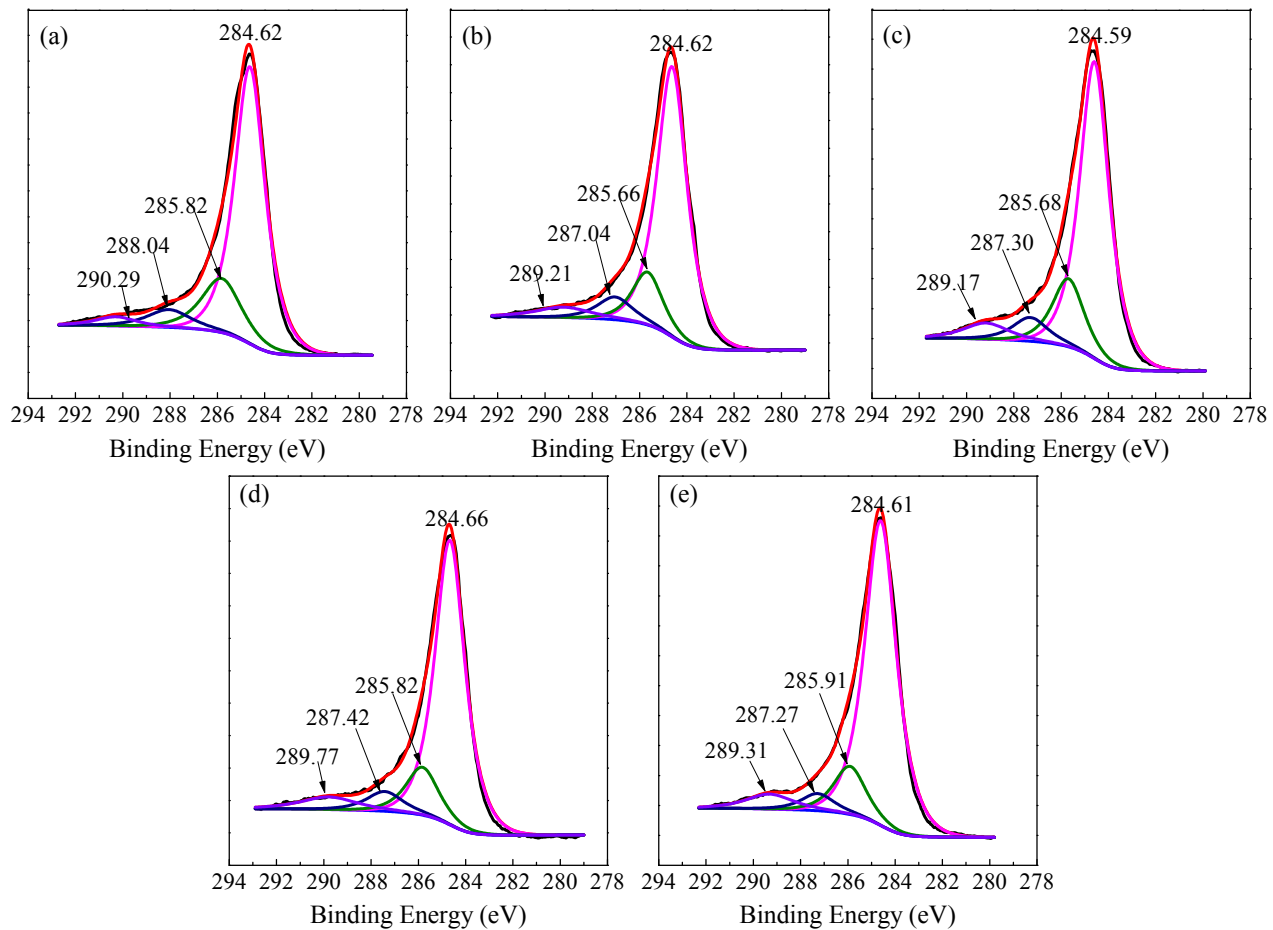

Fig. S3 C 1s binding energy patterns of prepared activated coke: AC (a), Fe8/AC (b), Co16/AC (c), Cu16/AC (d), and Ni12/AC (e).
